# Supplementary material for: Revealing the mechanistic pathway of cholinergic inhibition of Alzheimer's disease by donepezil: a metadynamics simulation study
Source: Royal Society of Chemistry journal article supplement (doi:10.1039/c9cp02613d), 2019-01-01
Supplement: c9cp02613d1.pdf [file c9cp02613d1.pdf]

## Revealing the Mechanistic Pathway of Cholinergic inhibition of Alzheimer's disease by Donepezil: A Metadynamics Simulation Study

Shibaji Ghosh,<sup>a,b</sup> Kalyanashis Jana,<sup>a,b</sup> and Bishwajit Ganguly\*<sup>a,b</sup>

<sup>a</sup>Computation and Simulation Unit (Analytical and Environmental Science Division and Centralized Instrument Facility), CSIR-Central Salt and Marine Chemicals Research Institute, Bhavnagar, Gujarat, India-364 002.

<sup>b</sup>Academy of Scientific and Innovative Research, CSIR-CSMCRI, Bhavnagar, Gujarat, India-364 002.

Fax: (+91)-278-2567562, Telephone: (+91)-278-2567760 Ext: 6770

E-mail: ganguly@csmcri.res.in; gang\_12@rediffmail.com

### Electronic supplementary information

#### *h*AChE & Donepezil Crystal

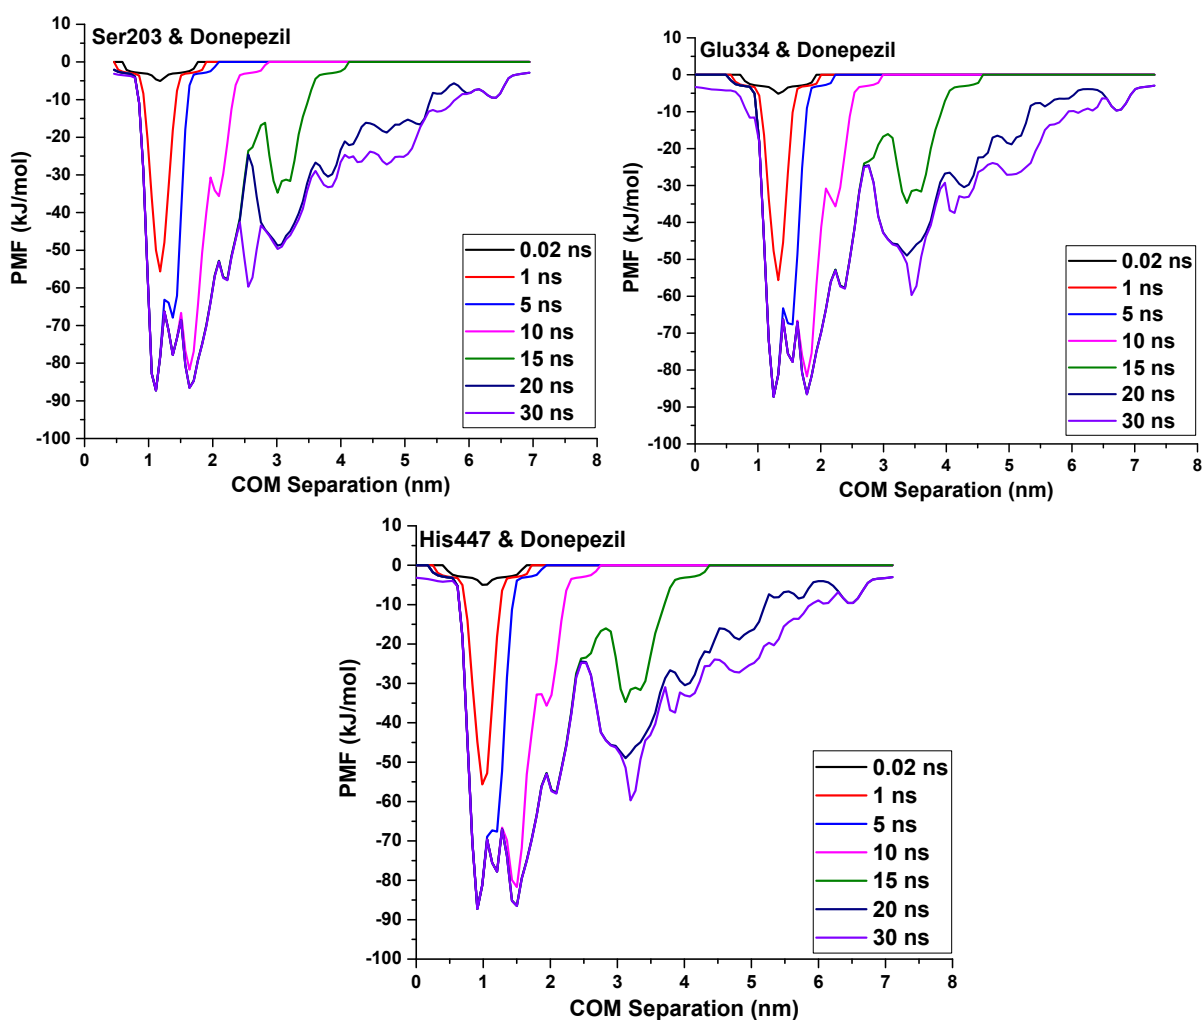

**Fig. S1** The free energy profiles as a function of a CV namely Ser203, Glu334 and His447 with donepezil crystal were plotted at different time and compared with other to access the convergence of a well-tempered metadynamics simulation.

## *h*AChE & Docked Donepezil

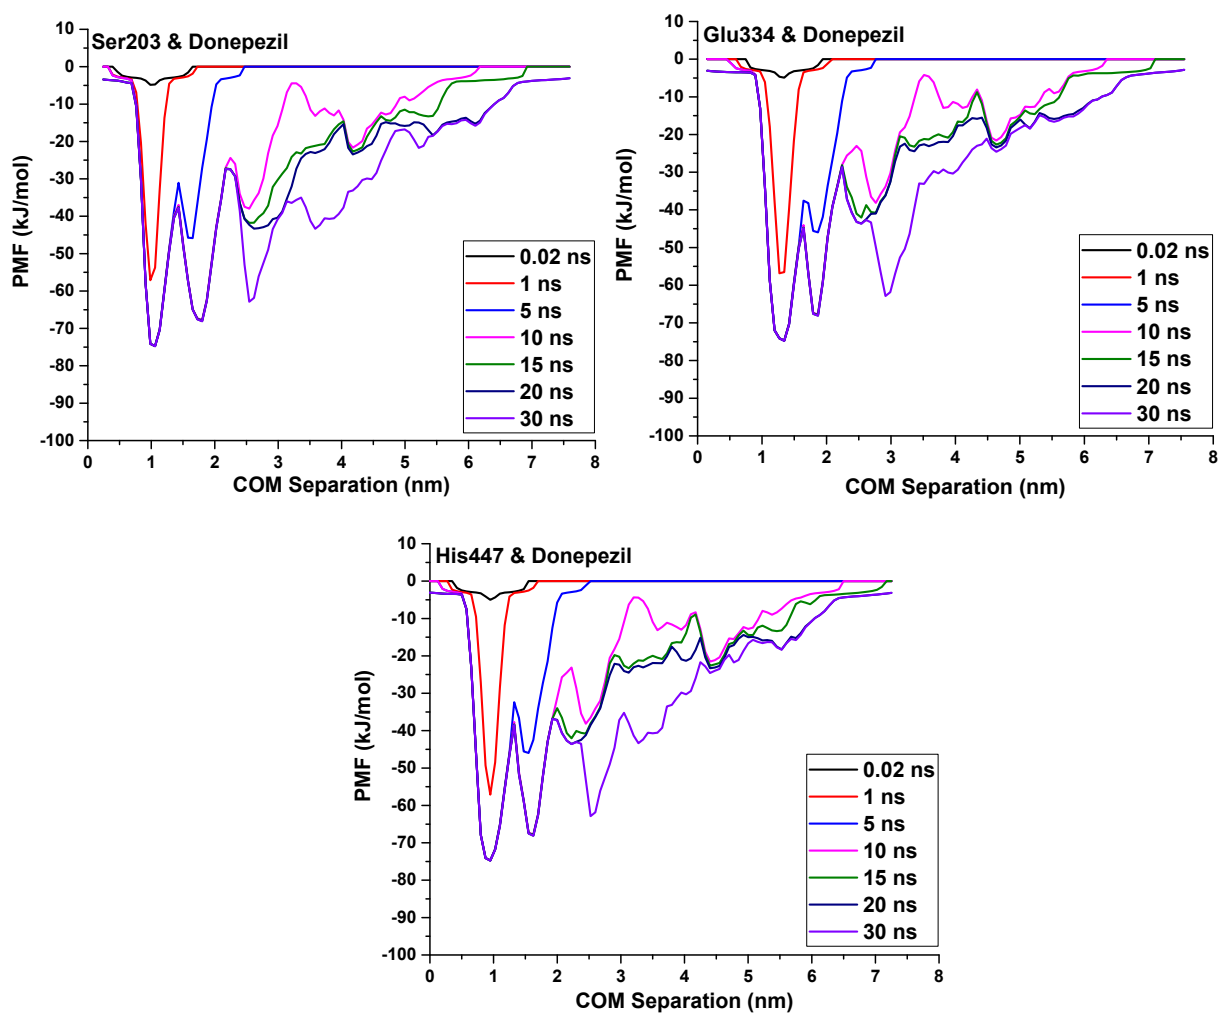

**Fig. S2** The free energy profiles as a function of a CV namely Ser203, Glu334 and His447 with docked donepezil were plotted at different time and compared with other to access the convergence of a well-tempered metadynamics simulation.

## *h*AChE & Donepezil Crystal

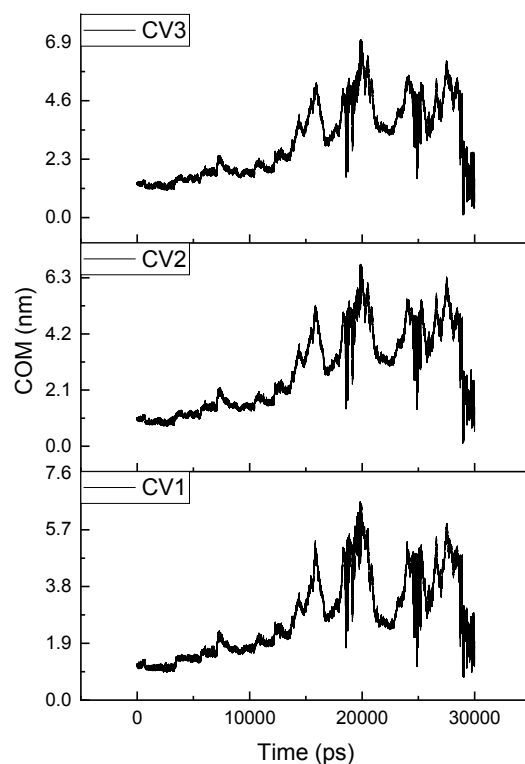

**Fig. S3** Time evaluation plot of the examined CVs (CV1 = Ser203 & Donepezil; CV2 = His447 & Donepezil; CV3 = Glu334 & Donepezil) of the well-tempered metadynamics simulation for Donepezil crystal.

## *h*AChE & Docked Donepezil

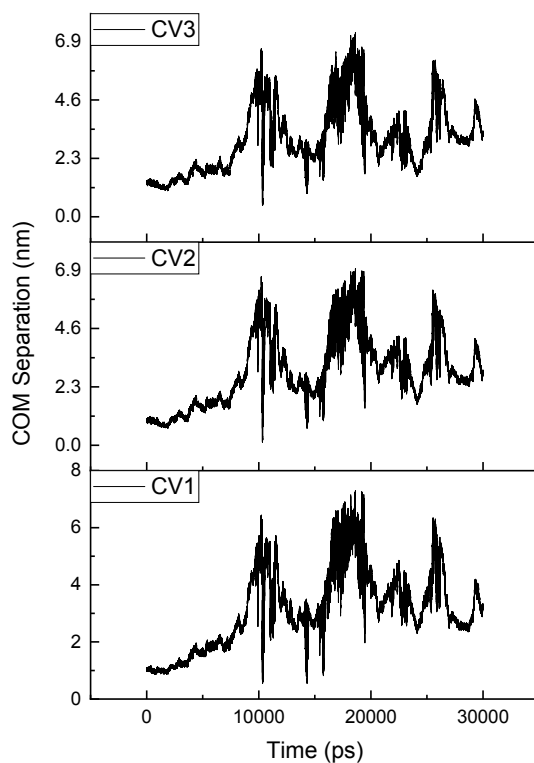

**Fig. S4** Time evaluation plot of the examined CVs (CV1 = Ser203 & donepezil; CV2 = His447 & Donepezil; CV3 = Glu334 & Donepezil) of the well-tempered metadynamics simulation for docked donepezil.
